# Supplementary material for: Assessing the contrast sensitivity function in myopic parafovea: A quick contrast sensitivity functions study
Source: PubMed Central journal article supplement (PMC9582454; doi:10.3389/fnins.2022.971009), 2022-10-06
Supplement: Data_Sheet_1.pdf [file Data_Sheet_1.pdf]

## *Supplementary Material*

*Supplementary Table S1 Test spatial frequencies at four eccentricities*

|    | <b>6°</b> | <b>12°</b> | <b>18°</b> | <b>24°</b> |
|----|-----------|------------|------------|------------|
| 1  | 0.70 cpd  | 0.70 cpd   | 0.70 cpd   | 0.70 cpd   |
| 2  | 0.84 cpd  | 0.82 cpd   | 0.81 cpd   | 0.80 cpd   |
| 3  | 1.02 cpd  | 0.96 cpd   | 0.94 cpd   | 0.91 cpd   |
| 4  | 1.22 cpd  | 1.13 cpd   | 1.08 cpd   | 1.04 cpd   |
| 5  | 1.47 cpd  | 1.33 cpd   | 1.25 cpd   | 1.19 cpd   |
| 6  | 1.78 cpd  | 1.56 cpd   | 1.44 cpd   | 1.35 cpd   |
| 7  | 2.14 cpd  | 1.83 cpd   | 1.67 cpd   | 1.54 cpd   |
| 8  | 2.58 cpd  | 2.15 cpd   | 1.93 cpd   | 1.76 cpd   |
| 9  | 3.11 cpd  | 2.52 cpd   | 2.23 cpd   | 2.01 cpd   |
| 10 | 3.74 cpd  | 2.96 cpd   | 2.58 cpd   | 2.29 cpd   |
| 11 | 4.51 cpd  | 3.47 cpd   | 2.98 cpd   | 2.61 cpd   |
| 12 | 5.43 cpd  | 4.07 cpd   | 3.45 cpd   | 2.98 cpd   |
| 13 | 6.54 cpd  | 4.78 cpd   | 3.98 cpd   | 3.40 cpd   |
| 14 | 7.88 cpd  | 5.61 cpd   | 4.60 cpd   | 3.88 cpd   |
| 15 | 9.49 cpd  | 6.59 cpd   | 5.32 cpd   | 4.43 cpd   |
| 16 | 11.44 cpd | 7.73 cpd   | 6.15 cpd   | 5.05 cpd   |
| 17 | 13.78 cpd | 9.07 cpd   | 7.11 cpd   | 5.76 cpd   |
| 18 | 16.60 cpd | 10.65 cpd  | 8.22 cpd   | 6.50 cpd   |
| 19 | 20.00 cpd | 12.50 cpd  | 9.50 cpd   | 7.50 cpd   |

***Supplementary Table S2 Three-way between-subjects ANOVA results for AULCSF and cut-off SF***

| Results    | Source                          | Sum of Squares | df  | Mean Square | F       | <i>p</i> -value |
|------------|---------------------------------|----------------|-----|-------------|---------|-----------------|
| AULCSF     | location                        | 3.619          | 3   | 1.206       | 30.156  | <0.001**        |
|            | eccentricity                    | 111.113        | 3   | 37.038      | 925.965 | <0.001**        |
|            | group                           | 0.120          | 1   | 0.120       | 2.996   | 0.084           |
|            | location x eccentricity         | 6.848          | 9   | 0.761       | 19.023  | <0.001**        |
|            | location x group                | 0.111          | 3   | 0.037       | 0.914   | 0.434           |
|            | eccentricity x group            | 0.441          | 3   | 0.147       | 3.673   | 0.012*          |
|            | location x eccentricity x group | 0.111          | 9   | 0.012       | 0.307   | 0.973           |
|            | Error                           | 33.279         | 832 | 0.040       |         |                 |
|            | Total                           | 686.069        | 866 |             |         |                 |
| Cut-off SF | location                        | 127.982        | 3   | 42.661      | 7.499   | <0.001**        |
|            | eccentricity                    | 8207.325       | 3   | 2735.775    | 480.897 | <0.001**        |
|            | group                           | 4.397          | 1   | 4.397       | 0.773   | 0.380           |
|            | location x eccentricity         | 308.279        | 9   | 34.253      | 6.021   | <0.001**        |
|            | location x group                | 44.090         | 3   | 14.697      | 2.583   | 0.052           |
|            | eccentricity x group            | 17.055         | 3   | 5.685       | 0.999   | 0.393           |
|            | location x eccentricity x group | 42.939         | 9   | 4.771       | 0.839   | 0.581           |
|            | Error                           | 4317.879       | 759 | 5.689       |         |                 |
|            | Total                           | 65025.175      | 793 |             |         |                 |

Abbreviations: df = degree of freedom

**Supplementary Table S3 Four-way between-subjects ANOVA results for low- and intermediate-SF AULCSF**

| Source                                     | Sum of Squares | df   | Mean Square | F       | <i>p</i> -value |
|--------------------------------------------|----------------|------|-------------|---------|-----------------|
| Location                                   | 645.707        | 3    | 215.236     | 13.677  | <0.0001**       |
| Eccentricity                               | 17319.777      | 3    | 5773.259    | 366.851 | <0.0001**       |
| Group                                      | 87.593         | 1    | 87.593      | 5.566   | 0.018*          |
| SF range                                   | 4312.039       | 1    | 4312.039    | 274.00  | <0.0001**       |
|                                            |                |      |             | 1       |                 |
| location x eccentricity                    | 913.129        | 9    | 101.459     | 6.447   | <0.0001**       |
| location x group                           | 16.976         | 3    | 5.659       | 0.360   | 0.782           |
| location x SF range                        | 470.287        | 3    | 156.762     | 9.961   | <0.0001**       |
| eccentricity x group                       | 98.479         | 3    | 32.826      | 2.086   | 0.100           |
| eccentricity x SF range                    | 9910.938       | 3    | 3303.646    | 209.924 | <0.0001**       |
| group x SF range                           | 86.848         | 1    | 86.848      | 5.519   | 0.019*          |
| location x eccentricity x group            | 348.046        | 9    | 38.672      | 2.457   | 0.009*          |
| location x eccentricity x SF range         | 505.078        | 9    | 56.120      | 3.566   | <0.0001**       |
| location x group x SF range                | 15.073         | 3    | 5.024       | 0.319   | 0.811           |
| eccentricity x group x SF range            | 64.239         | 3    | 21.413      | 1.361   | 0.253           |
| location x eccentricity x group x SF range | 345.916        | 9    | 38.435      | 2.442   | 0.009*          |
| Error                                      | 25038.109      | 1591 | 15.737      |         |                 |
| Total                                      | 103142.752     | 1655 |             |         |                 |

Abbreviations: df = degree of freedom

**Supplementary Table S4 Two-way ANOVA results for high-SF AULCSF**

| Source           | Sum of Squares | df  | Mean Square | F     | <i>p-value</i> |
|------------------|----------------|-----|-------------|-------|----------------|
| location         | 34.942         | 3   | 11.647      | 4.107 | 0.007*         |
| group            | 4.764          | 1   | 4.764       | 1.680 | 0.196          |
| location x group | 19.770         | 3   | 6.590       | 2.323 | 0.076          |
| Error            | 567.256        | 200 | 2.836       |       |                |
| Total            | 1318.103       | 208 |             |       |                |

Abbreviations: df = degree of freedom

**Supplementary Table S5 Four-way between-subjects ANOVA results for log CS**

| Source                               | Sum of Squares | df    | Mean Square | F        | <i>p-value</i> |
|--------------------------------------|----------------|-------|-------------|----------|----------------|
| Location                             | 103.676        | 3     | 34.559      | 415.374  | <0.001**       |
| Eccentricity                         | 706.543        | 3     | 235.514     | 2830.739 | <0.001**       |
| Group                                | 1.435          | 1     | 1.435       | 17.253   | <0.001**       |
| SF                                   | 5685.140       | 18    | 315.841     | 3796.218 | <0.001**       |
| location x eccentricity              | 297.417        | 9     | 33.046      | 397.197  | <0.001**       |
| location x group                     | 3.108          | 3     | 1.036       | 12.451   | <0.001**       |
| location x SF                        | 88.624         | 54    | 1.641       | 19.726   | <0.001**       |
| eccentricity x group                 | 7.861          | 3     | 2.620       | 31.495   | <0.001**       |
| eccentricity x SF                    | 182.499        | 54    | 3.380       | 40.621   | <0.001**       |
| group x SF                           | 4.465          | 18    | 0.248       | 2.982    | <0.001**       |
| location x eccentricity x group      | 1.909          | 9     | 0.212       | 2.549    | 0.006*         |
| location x eccentricity x SF         | 129.367        | 162   | 0.799       | 9.598    | <0.001**       |
| location x group x SF                | 1.097          | 54    | 0.020       | 0.244    | 1.000          |
| eccentricity x group x SF            | 1.899          | 54    | 0.035       | 0.423    | 1.000          |
| location x eccentricity x group x SF | 5.846          | 162   | 0.036       | 0.434    | 1.000          |
| Error                                | 1258.300       | 15124 | 0.083       |          |                |
| Total                                | 24937.112      | 15732 |             |          |                |

Abbreviations: df = degree of freedom
